# Supplementary material
Source: MDPI journal article supplement (https://www.mdpi.com/2673-6284/13/2/12)
Supplement: s1 [file s1]

# Supplementary Materials: Eco-Friendly Sanitization of Indoor Environments: Effectiveness of Thyme Essential Oil in Controlling Bioaerosol Levels and Disinfecting Surfaces

Daniela Sateriale, Giuseppina Forgione, Giuseppa Anna De Cristofaro, Leonardo Continisio, Chiara Pagliuca, Roberta Colicchio, Paola Salvatore, Marina Paolucci and Caterina Pagliarulo

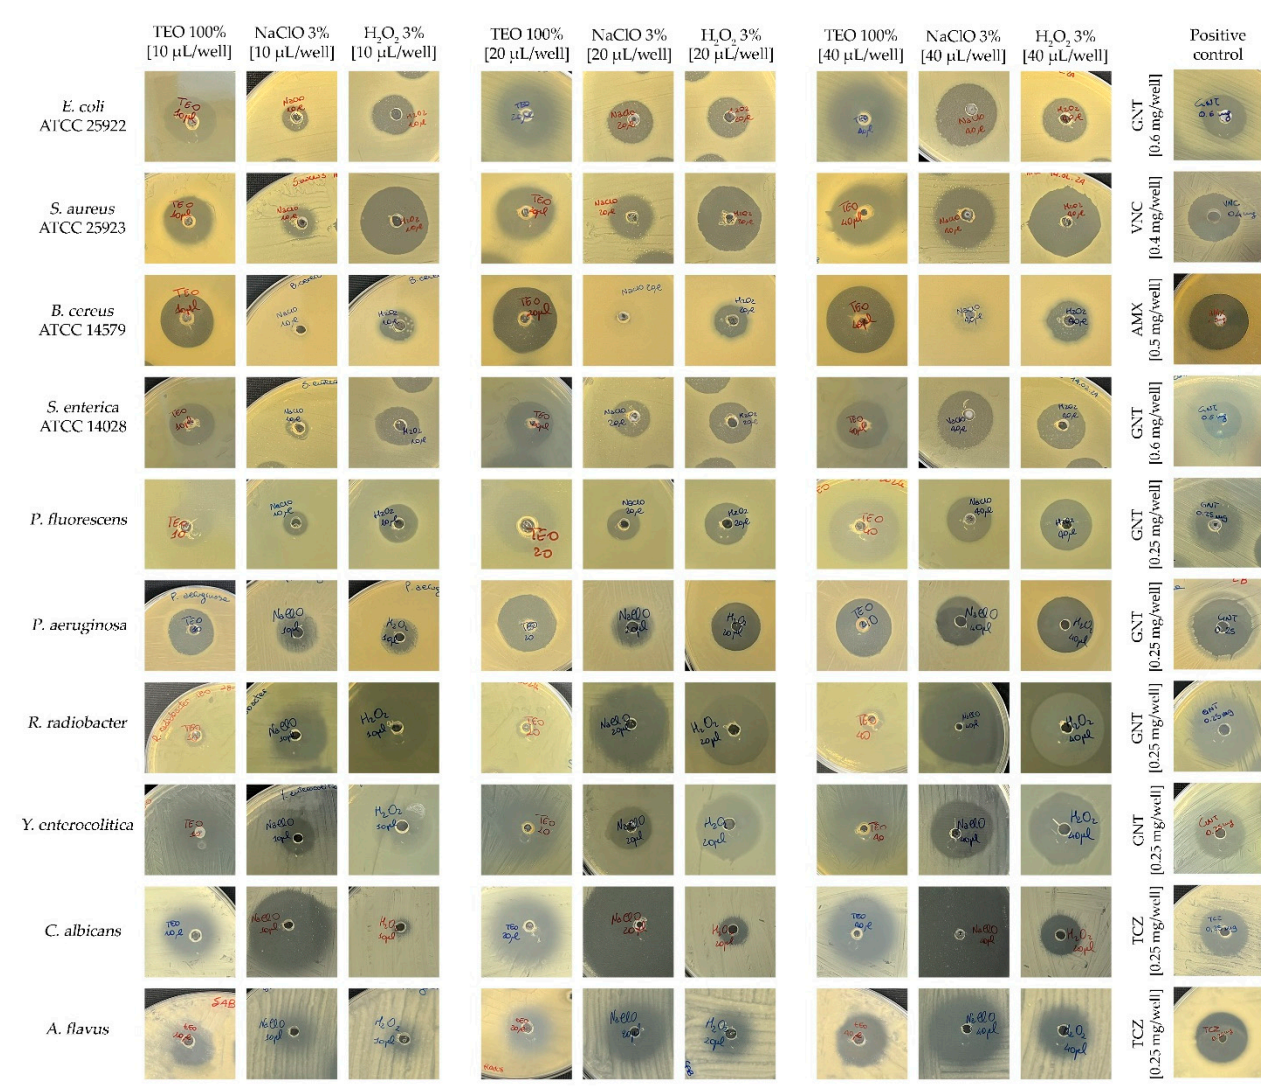

**Figure S1.** Images of *in vitro* antibacterial activity of thyme essential oil 100%, sodium hypochlorite solution 3%, hydrogen peroxide solution 3% and antimicrobials selected as positive controls, evaluated by the agar well diffusion method, against tested microorganisms. TEO, thyme essential oil; NaClO, sodium hypochlorite; H<sub>2</sub>O<sub>2</sub>, hydrogen peroxide; GNT, gentamicin; VNC, vancomycin; AMX, amoxicillin; TCZ, tioconazole.

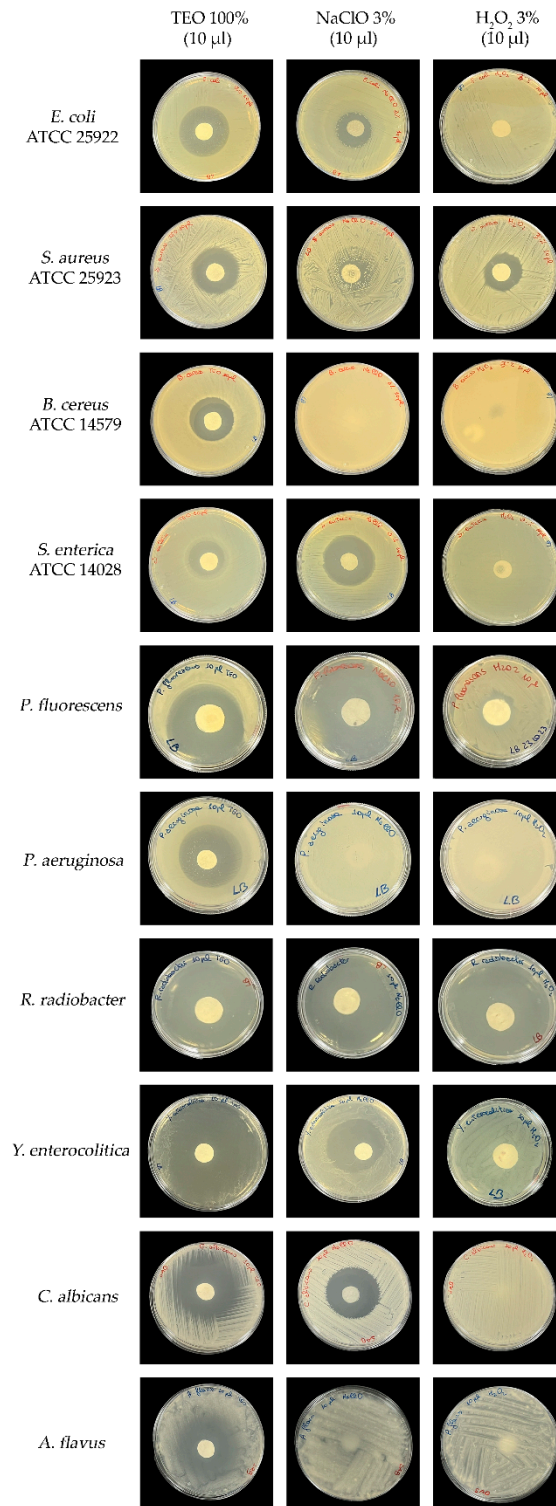

**Figure S2.** Images of *in vitro* antibacterial activity of thyme essential oil 100%, sodium hypochlorite solution 3% and hydrogen peroxide solution 3%, evaluated by disk volatilization method, against tested microorganisms. TEO, thyme essential oil; NaClO, sodium hypochlorite; H<sub>2</sub>O<sub>2</sub>, hydrogen peroxide.

|                                  | Negative control                                                                    | TEO 100%<br>[μL mL <sup>-1</sup> ]                                                         |                                                                                            | NaClO 3%<br>[μL mL <sup>-1</sup> ]                                                         |                                                                                            | H <sub>2</sub> O <sub>2</sub> 3%<br>[μL mL <sup>-1</sup> ]                                  |                                                                                              | Positive control<br>[μL mL <sup>-1</sup> ]                                                   |                                                                                              |
|----------------------------------|-------------------------------------------------------------------------------------|--------------------------------------------------------------------------------------------|--------------------------------------------------------------------------------------------|--------------------------------------------------------------------------------------------|--------------------------------------------------------------------------------------------|---------------------------------------------------------------------------------------------|----------------------------------------------------------------------------------------------|----------------------------------------------------------------------------------------------|----------------------------------------------------------------------------------------------|
|                                  | w/o treatment                                                                       | MIC                                                                                        | MBC/MFC                                                                                    | MIC                                                                                        | MBC/MFC                                                                                    | MIC                                                                                         | MBC/MFC                                                                                      | MIC                                                                                          | MBC/MFC                                                                                      |
| <i>E. coli</i><br>ATCC 25922     | 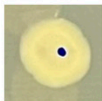   | <br>0.2   | <br>0.5   | <br>15    | <br>25    | <br>2     | <br>5     | <br>4     | <br>10    |
| <i>S. aureus</i><br>ATCC 25923   |    | <br>0.5   | <br>1     | <br>15    | <br>25    | <br>20    | <br>50    | <br>1.5   | <br>2.5   |
| <i>B. cereus</i><br>ATCC 14579   |    | <br>150   | <br>250   | <br>150   | <br>250   | <br>20    | <br>50    | <br>50    | <br>200   |
| <i>S. enterica</i><br>ATCC 14028 |    | Image not available<br>< 0.1      0.1                                                      |                                                                                            | <br>15    | <br>25    | <br>20    | <br>40    | <br>25    | <br>100   |
| <i>P. fluorescens</i>            |    | <br>0.4   | <br>1.5   | <br>10    | <br>20    | <br>20    | <br>40    | <br>0.1   | <br>0.5   |
| <i>P. aeruginosa</i>             |  | <br>20  | <br>80  | <br>40  | <br>100 | <br>20  | <br>100 | Image not available<br>< 0.1      0.1                                                        |                                                                                              |
| <i>R. radiobacter</i>            |  | <br>0.2 | <br>0.8 | <br>2.5 | <br>10  | <br>1.5 | <br>5   | Image not available<br>< 0.1      0.1                                                        |                                                                                              |
| <i>Y. enterocolitica</i>         |  | <br>0.4 | <br>0.8 | <br>10  | <br>20  | <br>10  | <br>20  | <br>0.1 | <br>1   |
| <i>C. albicans</i>               |  | <br>0.2 | <br>0.8 | <br>2   | <br>5   | <br>10  | <br>20  | <br>100 | <br>250 |

**Figure S3.** Images of quantitative evaluation of *in vitro* antibacterial activity of thyme essential oil 100%, sodium hypochlorite solution 3%, hydrogen peroxide solution 3% and antimicrobials selected as positive controls against tested microorganisms. Negative control, absence of antimicrobial agents; TEO, thyme essential oil; NaClO, sodium hypochlorite; H<sub>2</sub>O<sub>2</sub>, hydrogen peroxide; GNT, gentamicin; VNC, vancomycin; AMX, amoxicillin; TCZ, tioconazole.
